# Supplementary material for: Development of an Integrated Continuous Manufacturing Process for the rVSV-Vectored SARS-CoV-2 Candidate Vaccine
Source: MDPI journal article supplement (doi:10.3390/vaccines11040841), 2023-04-14
Supplement: s1 [file vaccines-2280687-supplementary.pdf › vaccines-2280687-supplementary.pdf]

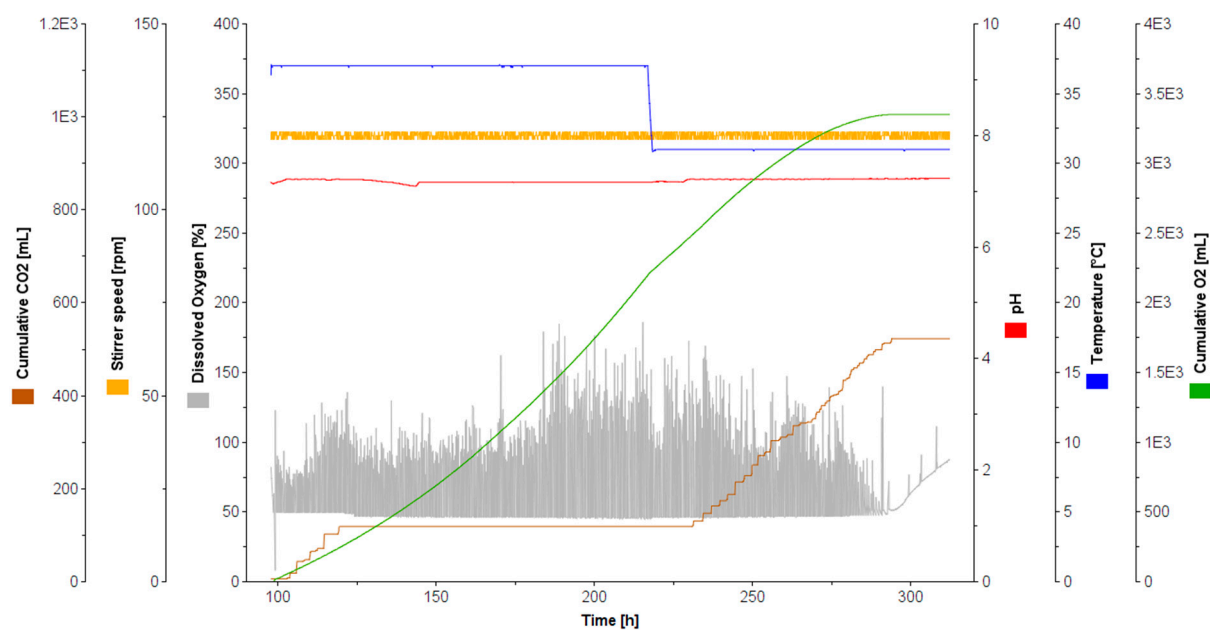

**Figure S1.** Time course curves of pH, temperature, dissolved oxygen, cumulative CO<sub>2</sub>, cumulative O<sub>2</sub> for perfusion bioreactor.

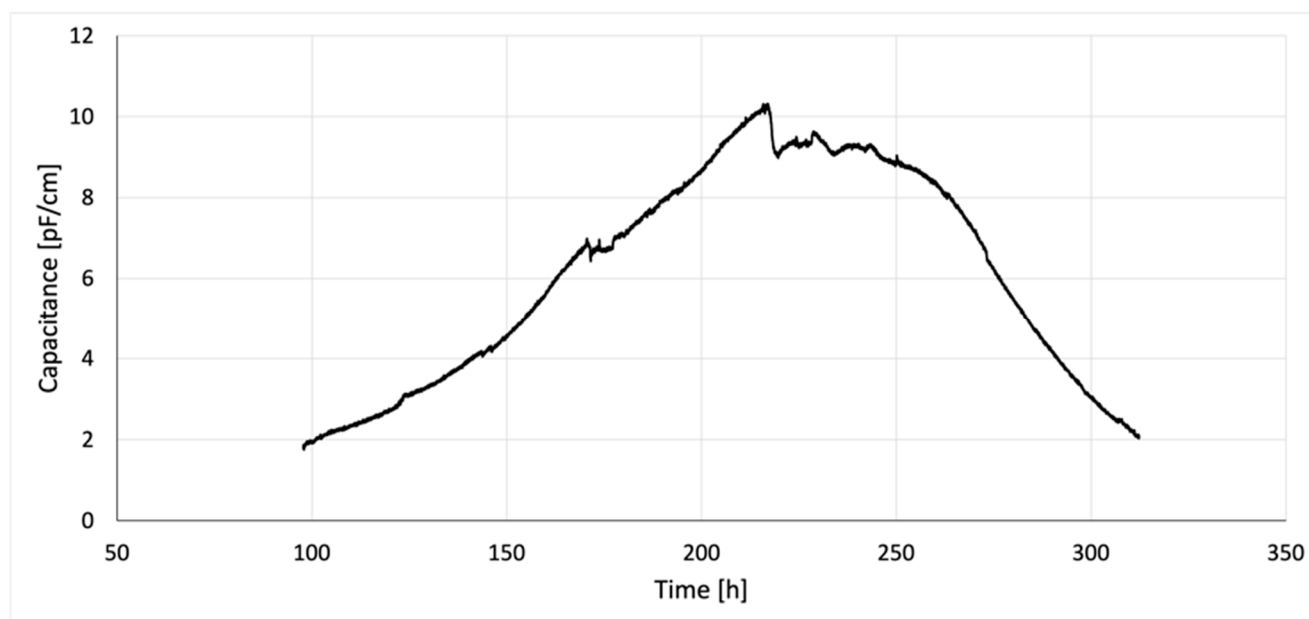

**Figure S2.** Time course curve of capacitance for perfusion bioreactor.

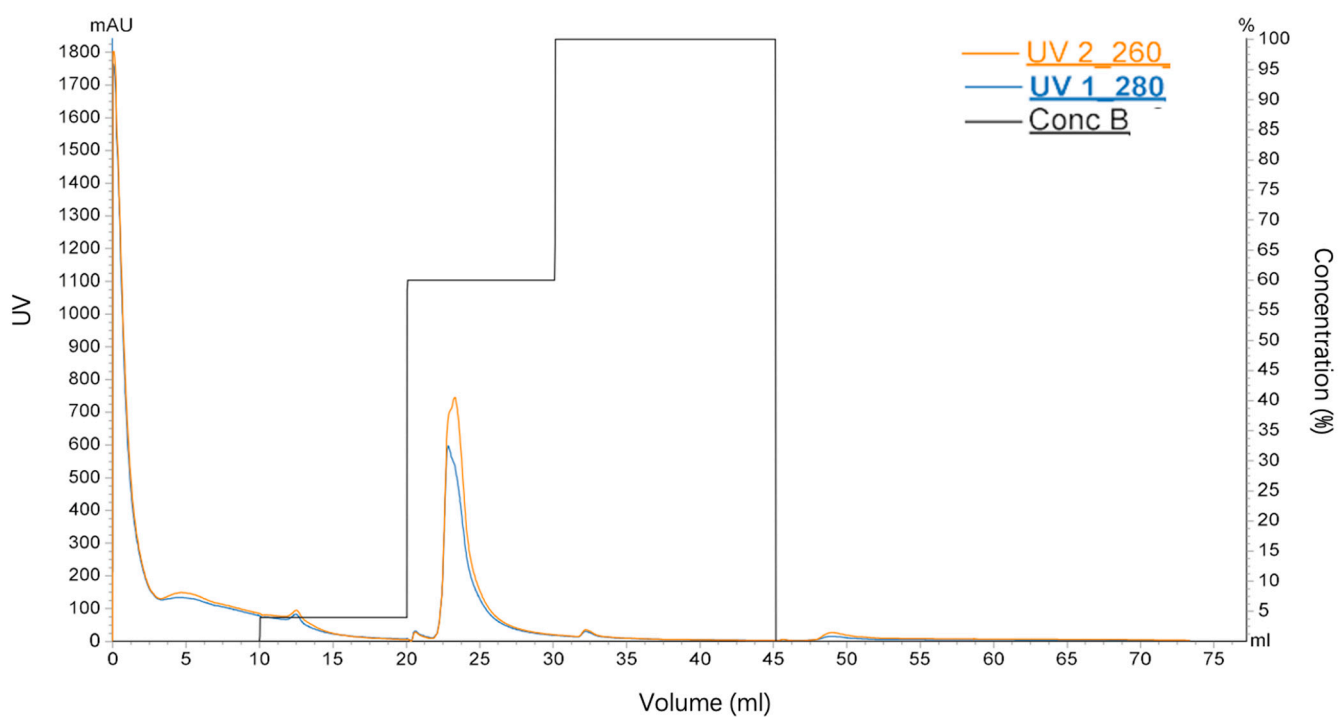

**Figure S3.** UV 280 nm, UV 260 nm, and concentration of Buffer B curves for continuous flow chromatography.
